# Supplementary material for: Tick Saliva Enhances Powassan Virus Transmission to the Host, Influencing Its Dissemination and the Course of Disease
Source: PubMed Central journal article supplement — J Virol. 2015 May 20;89(15):7852–60. doi: 10.1128/JVI.01056-15 (PMC4505606; doi:10.1128/jvi.01056-15), 2015-05-20
Supplement: JVI.01056-15_zjv999090615so1.pdf [file JVI.01056-15_zjv999090615so1.pdf]

| Gene name              | Forward                  | Reverse                  |
|------------------------|--------------------------|--------------------------|
| <b>CCL7</b>            | TTTGTTTCTTGACATAGCAGCAT  | TCTCACTCTCTTTCTCCACCA    |
| <b>CCL11</b>           | TGTAGCTCTTCAGTAGTGTGTTG  | CTTCTATTCTGCTGCTCACG     |
| <b>CXCI5</b>           | GATCCAGACAGACCTCCTTCT    | TTGATCGCTAATTTGGAGGTGA   |
| <b>GMCSF (CSF2)</b>    | CCTTGAGTTTGGTGAAATTGCC   | GTCTCTAACGAGTTCTCCTTCA   |
| <b>IFN-g</b>           | AGATAATCTGGCTCTGCAGGA    | GTCATTGAAAGCCTAGAAAGTCTG |
| <b>IL-10</b>           | ATGGCCTTGTAGACACCTTG     | GTCATCGATTTCTCCCCTGTG    |
| <b>IL-12a</b>          | CTCTCGTTCTTGTGTAGTTCCA   | ACAGATGACATGGTGAAGACG    |
| <b>IL-1b</b>           | CGAGATTTGAAGCTGGATGC     | TGACAGTGATGAGAATGACCTG   |
| <b>IL-2</b>            | GCAGAGGTCCAAGTTCATCTTC   | GCAGGATGGAGAATTACAGGAA   |
| <b>IL-36a (IL-1F6)</b> | GGTTGTACCACTCTTCTTGTGA   | CGATGAGCTGCCTGTTCTG      |
| <b>IL-4</b>            | TGATGCTCTTTAGGCTTTCCAG   | CAGAGACTCTTTCGGGCTTT     |
| <b>IL-5</b>            | CTCCAATGCATAGCTGGTGAT    | GAGATTCCCATGAGCACAGT     |
| <b>IL-6</b>            | GCAAGTGCATCATCGTTGTTC    | AGTCGGAGGCTTAATTACACAT   |
| <b>TNF-a</b>           | TCTTTGAGATCCATGCCGTTG    | AGACCCTCACACTCAGATCA     |
| <b>GAPDH</b>           | GTGGAGTCATACTGGAACATGTAG | AATGGTGAAGGTCGGTGTG      |

**Table S1:** List of genes and their corresponding real-time PCR primer pairs used for host gene expression profiling.
